1       **Title: Evidence for unique small RNA modifications in Alzheimer's disease**

2       Xudong Zhang<sup>1\*</sup>, Fatima Trebak<sup>2\*</sup>, Lucas AC Souza<sup>2</sup>, Junchao Shi<sup>3</sup>, Tong Zhou<sup>3</sup>,

3                               Patrick G. Kehoe<sup>4</sup>, Qi Chen<sup>1#</sup>, Yumei Feng Earley<sup>2#</sup>

4

- 5       1. Division of Biomedical Sciences, School of Medicine, University of California,  
6       Riverside, Riverside, CA, USA  
7       2. Departments of Pharmacology, Physiology & Cell Biology, Center for Molecular &  
8       Cellular Signal Transduction in the Cardiovascular System, University of Nevada,  
9       Reno, School of Medicine, Reno, NV, USA  
10      3. Departments of Physiology & Cell Biology, University of Nevada, Reno, School of  
11      Medicine, Reno, NV, USA  
12      4. Dementia Research Group, Translational Health Sciences, Bristol Medical  
13      School, University of Bristol, Bristol, UK  
14

15      \*Contributed equally to this work

16

17

18      **#Correspondence to:**

19

20      **Yumei Feng Earley, MD, PhD, FAHA**

21      Associate Professor of Pharmacology and Physiology & Cell Biology  
22      Center for Molecular & Cellular Signal Transduction in the Cardiovascular System  
23      University of Nevada, Reno, School of Medicine  
24      1664 North Virginia Street, Mail-stop 0318  
25      Reno, NV, 89557, USA  
26      E-mail: [yumeifeng@med.unr.edu](mailto:yumeifeng@med.unr.edu)

27

28      **Qi Chen, MD, PhD**

29      Assistant Professor  
30      Division of Biomedical Sciences, School of Medicine  
31      University of California, Riverside  
32      Riverside, CA, 92521, USA  
33      E-mail: [Qi.Chen@medsch.ucr.edu](mailto:Qi.Chen@medsch.ucr.edu)

34

35 **Abstract**

36 **Background:** While significant advances have been made in uncovering the aetiology  
37 of Alzheimer's disease and related dementias at the genetic level, molecular events at  
38 the epigenetic level remain largely un-investigated. Emerging evidence indicates that  
39 small non-coding RNAs (sncRNAs) and their associated RNA modifications are  
40 important regulators of complex physiological and pathological processes, including  
41 aging, stress responses, and epigenetic inheritance. However, whether small RNAs  
42 and their modifications are altered in dementia is not known.

43 **Methods:** We performed LC-MS/MS-based, high-throughput small RNA modification  
44 assays on post-mortem samples of the prefrontal lobe of Alzheimer's disease (AD),  
45 vascular dementia+AD (VaD+AD), and control individuals.

46 **Findings:** We report altered small RNA modifications in the 15–25-nt fractions  
47 enriched for microRNAs, and 30–40-nt RNA fractions enriched for tRNA-derived small  
48 RNAs (tsRNAs), rRNA-derived small RNAs (rsRNAs), and YRNA-derived small RNAs  
49 (ysRNAs). Interestingly, most of these altered RNA modifications were unique to AD  
50 and were not identified in VaD+AD subjects. In addition, sequencing of small RNA in  
51 the 30–40-nt fraction from AD cortices revealed reductions in rsRNA-5S, tsRNA-Tyr,  
52 and tsRNA-Arg.

53 **Interpretation:** These data suggest that sncRNAs and their associated modifications  
54 are novel signals that may be linked to the pathogenesis and development of  
55 Alzheimer's Disease.

56 **Funding:** NIH grants (R01HL122770, R01HL091905, 1P20GM130459,  
57 R01HD092431, P50HD098593, GM103440), AHA grant (17IRG33370128), Sigmund  
58 Gestetner Foundation Fellowship to P Kehoe.

59 **Keywords:** Non-coding RNA, Alzheimer's disease, Prefrontal cortex, Epigenetics

## 60 **Research in Context**

### 61 *Evidence before this study*

62 Alzheimer's disease (AD) and vascular dementia (VaD) are marked by cognitive impairment  
63 and neuropathologies caused by significant neuronal death. Associated gene mutations are rare  
64 in subjects with dementia, and the aetiology of these diseases is still not completely understood.  
65 Recent emerging evidence suggests that epigenetic changes are risk factors for the development  
66 of dementia. However, studies assessing small RNA modifications—one of the features of  
67 epigenetics—in dementia are lacking.

### 68 *Added value of this study*

69 We used high-throughput liquid chromatography-tandem mass spectrometry and small RNA  
70 sequencing to profile small RNA modifications and the composition of small RNAs in post-  
71 mortem samples of the prefrontal cortex of AD and control subjects. We detected and quantified  
72 16 types of RNA modifications and identified distinct small non-coding RNAs and  
73 modification signatures in AD subjects compared with controls.

### 74 *Implications of all the available evidence*

75 This study identified novel types and compositions of small RNA modifications in the  
76 prefrontal cortex of AD patients compared with control subjects in post-mortem samples. The  
77 cellular locations of these RNA modifications and whether they are drivers or outcomes of AD  
78 are still not known. However, results from the present study might open new possibilities for  
79 dissecting the dementia pathology.

80

81

82

83

84

## 85 **Introduction**

86 Alzheimer's disease (AD) and severe vascular cognitive impairment, also known as vascular  
87 dementia (VaD), are two of the most common types of dementia. They are characterized by  
88 cognitive impairment and neuropathology caused by neurotoxic forms of amyloid beta peptide,  
89 loss of synapses and neuronal function and, ultimately, significant neuronal loss. The aetiology  
90 of these forms of dementia is still not fully understood.<sup>1</sup>

91

92 Recent studies have highlighted epigenetic changes associated with aging or acquired through  
93 interactions with the environment as important risk factors for dementia, reflecting the fact that  
94 causative gene mutations are rare and are only present in a very small percentage of dementia  
95 patients. RNA modification is one of the most recently discovered epigenetic-mediated  
96 mechanisms for regulating physiological and pathological processes. Small RNA modifications,  
97 particularly those involving microRNAs (miRNAs) and transfer RNA-derived small RNAs  
98 (tsRNAs), have attracted considerable recent attention for their potential clinical relevance and  
99 possible use as diagnostic markers or therapeutic targets of diseases.<sup>2-4</sup> To date, evidence for  
100 changes in small RNA modifications in dementia is lacking. Thus, to gain insights into possible  
101 new mechanisms and identify potential biomarkers for dementia, we undertook an exploratory  
102 study to profile small RNA expression and modification status in dementia.

103

104 In this report, we profiled small RNAs modifications in post-mortem samples of human brain  
105 cortical tissue from patients with clinically and pathologically diagnosed AD, with or without  
106 VaD, as well as control individuals. To simultaneously detect and quantify 16 types of RNA  
107 modifications<sup>5,6</sup> in different small RNA fractions [15–25 nucleotides (nt), 30–40 nt] from AD  
108 patients and control individuals, we used high-throughput liquid chromatography-tandem mass  
109 spectrometry (LC-MS/MS). We also profiled the composition of small RNAs in AD and control

110 subjects using small RNA sequencing. These exploratory examinations revealed distinct  
111 sncRNA expression and RNA modification signatures between AD and controls, suggesting  
112 that these small RNAs are novel factors associated with the pathogenesis and/or progression of  
113 AD.

114

## 115 **Materials and methods**

### 116 **Human subjects for RNA modification assays**

117 A total of 34 post-mortem brain prefrontal lobe cortex samples from AD patients (n=18),  
118 VaD+AD patients (n=9), and control human subjects (n=7) were collected by post-mortem  
119 autopsy, snap-frozen, and stored in liquid nitrogen. The time between biospecimen acquisition  
120 and analysis ranged from 5 to 30 years, according to the Brain Bank database. Biospecimens  
121 were shipped on dry ice. Information from clinical and pathology reports was obtained from  
122 the brain bank database, developed as described.<sup>7</sup> On the basis of their clinical diagnosis,  
123 subjects were categorized into three groups: no significant abnormalities, AD, and VaD. All  
124 clinically diagnosed VaD subjects used in this study exhibited clear AD tau pathology and A $\beta$   
125 plaques with a neuropathological report of AD. Thus, this group was termed VaD+AD for  
126 purposes of distinguishing it from the AD group. Subjects were selected according to their  
127 confirmed clinical and pathological diagnosis as AD or normal, and were obtained from the  
128 Human Tissue Authority-licensed South West Dementia Brain Bank  
129 [http://www.bristol.ac.uk/translational-health-](http://www.bristol.ac.uk/translational-health-sciences/research/neurosciences/research/dementia/swdbb/)  
130 [sciences/research/neurosciences/research/dementia/swdbb/](http://www.bristol.ac.uk/translational-health-sciences/research/neurosciences/research/dementia/swdbb/), accessed on March 24<sup>th</sup>, 2020),  
131 University of Bristol, with tissue bank ethics approval from the South West–Central Bristol  
132 Research Ethics Committee. Clinical and pathological data included patient history, diagnosis  
133 and medications; pathological reports were available for retrospective analysis. Patients'  
134 personal information has been de-identified. Data for this study was collected between 1989

135 and 2015. The Research Integrity Offices at the University of Nevada, Reno, and University of  
136 Bristol have determined that this project complies with human research protection oversight by  
137 the Institutional Review Board.

138

### 139 **Isolation of total RNA from the human prefrontal cortex**

140 Total RNA was isolated from 100 mg of human prefrontal tissues using the TRIzol reagent  
141 (Thermo Fisher Scientific, Inc. Waltham, MA, USA), as described by the manufacturer. RNA  
142 quantity was evaluated using a NanoDrop 2000 microvolume spectrophotometer (Thermo  
143 Fisher). RNA samples were stored at -80°C until analysis. Researchers performing small RNA  
144 sequencing and RNA modifications assays on RNA samples were blinded to diagnosis and  
145 group-identifying information.

146

### 147 **Small RNA Sequencing**

148 Ten RNA samples from prefrontal lobe cortexes of control subjects and AD patients were  
149 submitted to BGI (Cambridge, MA, USA) for sequencing of 15–40-nt small RNAs. The number  
150 of clean reads varied from 30M to 40M across all samples. The Q20 score was greater than  
151 99.5% for all samples. Raw sequencing data for each sample were processed and analysed using  
152 our newly developed computational framework, *SPORTS1-0*<sup>8</sup>  
153 (<https://github.com/junchaoshi/sports1.0>), which is designed to optimize the annotation and  
154 quantification of non-canonical small RNAs (e.g., tsRNAs) in small RNA sequencing data.  
155 Sequencing adapters were removed, after which reads with lengths outside of the defined range  
156 and those with nucleotides other than ATUCG were discarded. Clean reads were mapped  
157 against the precompiled human small RNA annotation database  
158 ([https://github.com/junchaoshi/sports1.0/blob/master/precompiled\\_annotation\\_database.md](https://github.com/junchaoshi/sports1.0/blob/master/precompiled_annotation_database.md)).  
159 Small RNAs 15–25 and 30–40 nt in length were summarized separately.

## 160 **Small RNA purification and analysis of RNA modifications using LC-MS/MS**

161 Standardized ribonucleoside preparations, small RNA purification, and LC-MS/MS-based  
162 analysis of RNA modifications in RNA samples were performed as previously described.<sup>6</sup>  
163 Purified small RNAs (100–200 ng) from human brain samples were digested as input and  
164 loaded onto a ThermoFisher Vantage Quadrupole mass spectrometer connected to a Thermo  
165 Ultimate 3000 UHPLC system equipped with an electrospray ionization source. The MS system  
166 was operated in positive ion mode using a multiple reaction monitoring (MRM) approach. LC-  
167 MS/MS raw data were acquired using Xcalibur Workstation software and were processed using  
168 Xcalibur QuanBrowser for quantification of modified ribonucleoside concentrations. The  
169 percentage of each modified ribonucleoside was normalized to the total amount of quantified  
170 ribonucleosides containing the same nucleobase, an approach that decreases/eliminates errors  
171 caused by sample loading variation. For example, the percentage of m<sup>5</sup>C = mole concentration  
172 (m<sup>5</sup>C)/mole concentration (m<sup>5</sup>C + Cm + C + ac<sup>4</sup>C). Fold-changes in RNA modifications  
173 between different groups were calculated based on the percentage of modified ribonucleosides.  
174 Brain RNAs 15–25 and 30–40 nucleotides (nt) in length were examined.

175

## 176 **Statistical analysis**

177 Data are presented as means ± SEM and were plotted using Prism8 software (GraphPad, La  
178 Jolla, CA, USA). Differential expression analyses were performed using the *edgeR* tool (pmid:  
179 19910308), controlling for age and sex. RNAs with a false discovery rate < 10% were deemed  
180 to be differentially expressed. RNA modification levels between groups were compared using  
181 a linear model that controls for age and sex. Unpaired *t* tests were used for comparisons of  
182 participants' characteristics between groups. A *P*-value < 0.05 was considered statistically  
183 significant.

184

## 185 **Results**

### 186 **Participant characteristics**

187 As summarized in Table 1, patients (AD and VaD+AD) and control individuals were similar in  
188 terms of age. Almost all patients were White/European except for one patient whose race was  
189 unknown. There were slightly more males (58·8%) than females (41·2%). Brain weight was  
190 significantly lower in AD ( $P = 0\cdot0099$ ) and VaD+AD ( $P = 0\cdot046$ ) groups compared with the  
191 control group. The post-mortem autopsy delay time was similar among groups.

192

### 193 **Altered small RNA modification profiles in the cerebral cortex of AD patients**

194 To systemically analyse small RNA expression and modification profiles, we collected the 15–  
195 40-nt RNA fraction from the brain frontal lobe cortex for small RNA sequencing as we  
196 previously described<sup>5,6</sup>, and then performed bioinformatic analyses using our recently  
197 developed software, *SPORTS1.0*.<sup>8</sup> In addition, 15–25-nt and 30–40-nt RNA fractions were  
198 collected for high-throughput examination of RNA modification by LC-MS/MS (Figure 1).<sup>5,9</sup>  
199 These analyses resulted in the identification and quantification of 16 types of RNA  
200 modifications.

201

202 In the 15–25-nt RNA fraction from the cortex of AD brains (Figure 2A), we found an increase  
203 in 2'-O-methylcytidine (Cm) and 7-methylguanosine ( $m^7G$ ), and significant reductions in  
204  $N^2,N^2,7$ -trimethylguanosine ( $m^{2,2,7}G$ ) and  $N^2,N^2$ -dimethylguanosine ( $m^{2,2}G$ ) compared with  
205 controls (Figure 2B–E). Interestingly, these changes were not present in the cortex of VaD+AD  
206 patients' brains, and thus were unique to the brains' of AD-only subjects. Other RNA  
207 modifications that were not significantly different among groups were also detected, as shown  
208 in Supplemental Figure S1.

209



210 In the 30–40-nt small RNA fraction from the cortex of AD brains (Figure 3A), we found  
211 significantly higher levels of Cm, 2'-O-methyluridine (Um) and 7-methylguanosine (m<sup>7</sup>G)  
212 modifications, and reductions in 1-methylguanosine (m<sup>1</sup>G), m<sup>2,2,7</sup>G, and pseudouridine (psi or  
213 Ψ) modifications compared with controls (Figure 3B–G). Among 30–40-nt small RNAs, we  
214 found only one specific RNA modification, psi, that was changed in the VaD+AD brain cortex,  
215 where this modification was reduced compared with controls (Figure 3G). Again, other RNA  
216 modifications were detected in this 30–40-nt fraction that did not exhibit significant differences  
217 among groups, as shown in Supplemental Figure S2.

218

### 219 **Altered 30–40-nt small RNA expression profiles in the cerebral cortex of AD patients**

220 To systemically analyse small RNA expression profiles, we collected the 15–40-nt fraction  
221 from the brain frontal lobe cortex of AD patients and controls for small RNA sequencing, as  
222 we previously described<sup>5,6</sup>, and then performed bioinformatic analyses using our recently  
223 developed software, *SPORTS1-0*<sup>8</sup>. Our RNA-seq analysis showed that the 15–25-nt RNA  
224 population was predominantly miRNAs (Figure 4A) in AD and control samples, whereas the  
225 expression profile of the small RNA population in the 30–40-nt fraction showed more dynamic  
226 changes. Our RNA-seq data revealed three major subtypes in the 30–40-nt fraction, namely  
227 tRNA-derived small RNAs (tsRNAs), rRNA-derived small RNAs (rsRNAs) and Y RNA-  
228 derived small RNAs (ysRNAs); other un-annotated RNAs were also found (Figure 4B).  
229 Although there were trends toward an increase in tsRNAs and a reduction in ysRNAs in AD  
230 patients, these differences did not reach statistical significance. A further analysis of specific  
231 small RNA fragments in these samples revealed that the majority of the 15–25-nt fraction was  
232 miRNAs (Figure 4A). We did not find significant differences in the specific small RNA  
233 sequences in this fraction between AD and control samples (data not shown). Interestingly, in

234 the 30–40-nt fraction, we found a significant reduction in rRNA-5S, tsRNA-Tyr and tsRNA-  
235 Arg fragments in AD patients compared with controls (Figure 4C–E).

236

## 237 **Discussion**

238 Emerging evidence shows that small RNAs, including miRNAs, tsRNAs and piwi-interacting  
239 RNAs, harbour a diversity of RNA modifications.<sup>10</sup> The physiological and pathological  
240 importance of these small, non-coding RNA modifications has only recently begun to emerge,  
241 as highlighted by studies revealing their active involvement in stress responses, metabolism,  
242 immunity, and epigenetic inheritance of environmentally acquired traits.<sup>2</sup> RNA modifications  
243 have recently been detected in the nervous system, where they are involved in the regulation of  
244 cortical differentiation, behaviour, and brain functions.<sup>11,12</sup> However, to our knowledge, there  
245 have been no reports on the status of small RNA modifications in AD or VaD to date.

246

247 The current study showed intriguing differences in small RNA-modification signatures between  
248 AD patients and control subjects, suggesting an association and possible contribution of such  
249 modifications to the pathogenesis and/or progression of AD. Notably, most of the altered RNA  
250 modifications were not observed in VaD+AD patients, with the exception of psi, as noted above,  
251 providing molecular evidence for potential distinct signatures between these two patient groups.  
252 In the last three decades, dementia research has demonstrated significant overlaps between AD  
253 and VaD in terms of clinical symptoms, risk factors, and post-mortem brain autopsy findings.<sup>13-</sup>  
254 <sup>15</sup> Therapeutically, drugs that enhance cholinergic activity are as effective in patients suffering  
255 from VaD as they are in AD patients.<sup>16</sup> More recently, drugs that have traditionally been used  
256 for cardiovascular diseases, especially renin-angiotensin system blockers, have shown benefits  
257 not only in VaD patients, but also in AD patients.<sup>17-19</sup> However, the pathogenesis of AD, VaD,  
258 and VaD+AD remains incompletely understood. We were surprised to find only one common

259 signature among RNA modifications in AD and VaD+AD patients that might contribute to  
260 shared mechanisms of dementia pathology. Alternatively, these distinct molecular signatures  
261 could suggest the existence of as-yet undiscovered differences in pathological processes  
262 between these conditions, a possibility that might be harnessed for future condition-specific  
263 treatments.

264

265 The 15–25-nt RNAs were predominantly miRNAs, whereas 30–40-nt RNAs were  
266 predominantly tsRNAs, rsRNAs and ysRNAs, as demonstrated by small RNA sequencing. We  
267 found changes in RNA-modification profiles in the AD brain cortex in both fractions of small  
268 RNAs. While the importance of miRNA in the pathogenesis of AD is relatively well described<sup>20</sup>,  
269 the role of rsRNAs and ysRNAs in a pathophysiological context has only begun to emerge.<sup>6,21,22</sup>

270 The dynamic expression of these non-canonical small RNAs suggests the possibility of  
271 unidentified biological functions that warrant further investigation<sup>23,24</sup>, particularly in relation  
272 to several risk factor genes that have been identified for AD in the last few decades.<sup>25,26</sup> This  
273 situation is similar to that for tsRNAs, which have shown recently expanding functions.<sup>4,27,28</sup>

274 The novel RNA modifications that showed dynamic changes in AD patients included Cm, Um,  
275 m<sup>7</sup>G, m<sup>1</sup>G, m<sup>2,2,7</sup>G, and psi. The functions and identities of these small RNA modifications in  
276 AD are not yet understood. We identified increases in 2'-O-methylation of cytidine (Cm),  
277 guanosine (Gm) and uridine (Um), as well as m<sup>7</sup>G, while observing a reduction in m<sup>2,2,7</sup>G in  
278 the brain cortex of dementia patients, suggesting the potential importance of these RNA  
279 modifications, either as compensatory responses (Cm, Gm, Um, m<sup>7</sup>G)<sup>29-31</sup> or as actual causes  
280 of pathogenesis (m<sup>2,2,7</sup>G).<sup>32,33</sup>

281

282 tRNA-derived small RNAs are reported to contribute to multiple pathological processes,  
283 including cancer, viral infection, and age-related neurodegenerative diseases.<sup>2</sup> In the

284 senescence-accelerated mouse prone 8 (SAMP8) model, which mimics age-related neuro-  
285 disorders such as AD and Parkinson disease, tsRNAs, including tsRNA-Tyr and tsRNA-Arg,  
286 in brain tissue are dysregulated compared with normal brain tissue. The targets of these  
287 dysregulated tsRNAs are enriched in neurodevelopment pathways such as synapse formation.<sup>34</sup>  
288 In addition, knockout of the RNA kinase, Clp1, in mice leads to progressive loss of motor  
289 neuron function in association with the accumulation of Try-tRNA and Arg-tRNA small RNAs.  
290 These tsRNAs sensitize motor neurons to oxidative stress-induced cell death, suggesting that  
291 tsRNAs are involved in normal motor neuron functions and responses to oxidative stress.<sup>35</sup> A  
292 similar phenomenon was reported in a human neurological disease cohort, and it was shown  
293 that transfection of small RNAs from 5' Tyr-tRNA can protect CLP-mutant cells from oxidative  
294 stress-induced cell death.<sup>36</sup> In our study, the decrease in 5'tsRNA-Tyr in AD subjects may  
295 confer greater vulnerability to oxidative stress on neurons. Interestingly another report showed  
296 that the expression of 5s rRNA and the oxidized level of 5S rRNA are dynamically modulated  
297 in AD's subjects<sup>37</sup>, findings that may be related to the biogenesis of rRNAs and might explain  
298 alterations of rRNA-5s in the AD group in the current study.

299  
300 Whether the changes in small RNAs and RNA modifications observed here represent drivers  
301 or outcomes of AD remains unknown. The precise meaning of each of these changes in terms  
302 of their specific functions awaits discovery. Future efforts to pinpoint the locations of these  
303 modifications in each sncRNA population and identify enzymes involved in their regulation  
304 would be invaluable<sup>38,39</sup> and will open new avenues for dissecting the nature of dementia  
305 pathology.

306  
307  
308

309 **Funding**

310 This work was supported, in part, by grants from the National Institutes of Health (NIH/NHLBI)  
311 (R01HL122770, R01HL091905), NIH/NIGMS (1P20GM130459) and the American Heart  
312 Association National Center (17IRG33370128) to Y. Feng Earley, and from the NIH/NICHD  
313 to Q. Chen (R01HD092431) and T. Zhou (P50HD098593). Research reported in this  
314 publication used instruments from the Dr. Mick Hitchcock Proteomics Core supported by a  
315 grant from the NIH/NIGMS (GM103440) of the National Institutes of Health. University of  
316 Bristol Alumni. P Kehoe is supported by a Fellowship from the Sigmund Gestetner Foundation.  
317 The funders had no role in study design, data collection, analysis, and interpretation, as well as  
318 writing of the manuscript.

319

320 **Declaration of competing interests**

321 The authors declare no competing interests.

322

323 **Data Availability**

324 All data associated with this study are contained in the paper or Supplementary Materials. RNA  
325 sequencing data will be deposited in an online repository (Mendeley Data) upon acceptance of  
326 the manuscript.

327

328 **Acknowledgements**

329 We would like to thank Dr. David Quilici and Rebekah Woolsey from the Mick Hitchcock,  
330 Ph.D. Nevada Proteomics Center for technical support with the HPLC/MS instruments. We  
331 would especially like to thank Dr. Laura Palmer for tissue processing and facilitating access to  
332 clinical data from the South West Dementia Brain Bank at the University of Bristol, which is  
333 supported by grants from BRACE, ABBUK.

334

335 **Supplemental Materials**

336 Supplementary material associated with this article can be found in the online version at doi:

337 [10.6084/m9.figshare.12227393](https://doi.org/10.6084/m9.figshare.12227393)

338

339 **References:**

- 340 1. Panza F, Lozupone M, Watling M, Imbimbo BP. Do BACE inhibitor failures in  
341 Alzheimer patients challenge the amyloid hypothesis of the disease? *Expert review of*  
342 *neurotherapeutics* 2019; **19**(7): 599-602.
- 343 2. Zhang X, Cozen AE, Liu Y, Chen Q, Lowe TM. Small RNA Modifications: Integral to  
344 Function and Disease. *Trends Mol Med* 2016; **22**(12): 1025-34.
- 345 3. Chen Q, Yan W, Duan E. Epigenetic inheritance of acquired traits through sperm RNAs  
346 and sperm RNA modifications. *Nature reviews Genetics* 2016; **17**(12): 733-43.
- 347 4. Schimmel P. The emerging complexity of the tRNA world: mammalian tRNAs beyond  
348 protein synthesis. *Nature reviews Molecular cell biology* 2018; **19**(1): 45-58.
- 349 5. Chen Q, Yan M, Cao Z, et al. Sperm tsRNAs contribute to intergenerational inheritance  
350 of an acquired metabolic disorder. *Science* 2016; **351**(6271): 397-400.
- 351 6. Zhang Y, Zhang X, Shi J, et al. Dnmt2 mediates intergenerational transmission of  
352 paternally acquired metabolic disorders through sperm small non-coding RNAs. *Nature cell*  
353 *biology* 2018; **20**(5): 535-40.
- 354 7. Hyman BT, Phelps CH, Beach TG, et al. National Institute on Aging-Alzheimer's  
355 Association guidelines for the neuropathologic assessment of Alzheimer's disease. *Alzheimer's*  
356 *& dementia : the journal of the Alzheimer's Association* 2012; **8**(1): 1-13.
- 357 8. Shi J, Ko EA, Sanders KM, Chen Q, Zhou T. SPORTS1.0: A Tool for Annotating and  
358 Profiling Non-coding RNAs Optimized for rRNA- and tRNA-derived Small RNAs. *Genomics*  
359 *Proteomics Bioinformatics* 2018; **16**(2): 144-51.
- 360 9. Fang H, Deng M, Zhang L, et al. Role of (Pro)Renin Receptor in Albumin Overload-  
361 Induced Nephropathy in Rats. *Am J Physiol Renal Physiol* 2018.
- 362 10. Roundtree IA, Evans ME, Pan T, He C. Dynamic RNA Modifications in Gene  
363 Expression Regulation. *Cell* 2017; **169**(7): 1187-200.
- 364 11. Satterlee JS, Basanta-Sanchez M, Blanco S, et al. Novel RNA modifications in the  
365 nervous system: form and function. *The Journal of neuroscience : the official journal of the*  
366 *Society for Neuroscience* 2014; **34**(46): 15170-7.
- 367 12. Jung Y, Goldman D. Role of RNA modifications in brain and behavior. *Genes, brain,*  
368 *and behavior* 2018; **17**(3): e12444.
- 369 13. Ravona-Springer R, Davidson M, Noy S. Is the distinction between Alzheimer's disease  
370 and vascular dementia possible and relevant? *Dialogues in clinical neuroscience* 2003; **5**(1): 7-  
371 15.
- 372 14. Mirra SS, Heyman A, McKeel D, et al. The Consortium to Establish a Registry for  
373 Alzheimer's Disease (CERAD). *Neurology* 1991; **41**(4): 479.
- 374 15. Meyer JS, Xu G, Thornby J, Chowdhury MH, Quach M. Is mild cognitive impairment  
375 prodromal for vascular dementia like Alzheimer's disease? *Stroke* 2002; **33**(8): 1981-5.
- 376 16. Erkinjuntti T, Kurz A, Gauthier S, Bullock R, Lilienfeld S, Damaraju CV. Efficacy of  
377 galantamine in probable vascular dementia and Alzheimer's disease combined with  
378 cerebrovascular disease: a randomised trial. *Lancet* 2002; **359**(9314): 1283-90.
- 379 17. Zhuang S, Wang H-F, Wang X, Li J, Xing C-M. The association of renin-angiotensin  
380 system blockade use with the risks of cognitive impairment of aging and Alzheimer's disease:  
381 A meta-analysis. *Journal of Clinical Neuroscience* 2016; **33**: 32-8.
- 382 18. Chou C-L, Yeh H-I. The Role of the Renin-Angiotensin System in Amyloid Metabolism  
383 of Alzheimer's Disease. *Acta Cardiologica Sinica* 2014; **30**(2): 114-8.
- 384 19. Gebre AK, Altaye BM, Atey TM, Tuem KB, Berhe DF. Targeting Renin-Angiotensin  
385 System Against Alzheimer's Disease. *Frontiers in pharmacology* 2018; **9**: 440.
- 386 20. Ayers D, Scerri C. Non-coding RNA influences in dementia. *Noncoding RNA Res* 2018;  
387 **3**(4): 188-94.

- 388 21. Hizir Z, Bottini S, Grandjean V, Trabucchi M, Repetto E. RNY (YRNA)-derived small  
389 RNAs regulate cell death and inflammation in monocytes/macrophages. *Cell Death Dis* 2017;  
390 **8**(1): e2530.
- 391 22. Zhang Y, Shi J, Rassoulzadegan M, Tuorto F, Chen Q. Sperm RNA code programmes  
392 the metabolic health of offspring. *Nature reviews Endocrinology* 2019; **15**(8): 489-98.
- 393 23. Kowalski MP, Krude T. Functional roles of non-coding Y RNAs. *The international*  
394 *journal of biochemistry & cell biology* 2015; **66**: 20-9.
- 395 24. Kabeerdoss J, Sandhya P, Danda D. Y RNA derived small RNAs in Sjogren's syndrome:  
396 Candidate biomarkers? *International journal of rheumatic diseases* 2017; **20**(11): 1763-6.
- 397 25. Lambert JC, Ibrahim-Verbaas CA, Harold D, et al. Meta-analysis of 74,046 individuals  
398 identifies 11 new susceptibility loci for Alzheimer's disease. *Nature genetics* 2013; **45**(12):  
399 1452-8.
- 400 26. Kunkle BW, Grenier-Boley B, Sims R, et al. Genetic meta-analysis of diagnosed  
401 Alzheimer's disease identifies new risk loci and implicates Abeta, tau, immunity and lipid  
402 processing. *Nature genetics* 2019; **51**(3): 414-30.
- 403 27. Oberbauer V, Schaefer MR. tRNA-Derived Small RNAs: Biogenesis, Modification,  
404 Function and Potential Impact on Human Disease Development. *Genes (Basel)* 2018; **9**(12).
- 405 28. Shi J, Zhang Y, Zhou T, Chen Q. tsRNAs: The Swiss Army Knife for Translational  
406 Regulation. *Trends Biochem Sci* 2019; **44**(3): 185-9.
- 407 29. Ji L, Chen X. Regulation of small RNA stability: methylation and beyond. *Cell research*  
408 2012; **22**(4): 624-36.
- 409 30. Ren G, Xie M, Zhang S, Vinovskis C, Chen X, Yu B. Methylation protects microRNAs  
410 from an AGO1-associated activity that uridylylates 5' RNA fragments generated by AGO1  
411 cleavage. *Proc Natl Acad Sci U S A* 2014; **111**(17): 6365-70.
- 412 31. Lee M, Kim B, Kim VN. Emerging roles of RNA modification: m(6)A and U-tail. *Cell*  
413 2014; **158**(5): 980-7.
- 414 32. Will CL, Luhrmann R. Spliceosomal UsnRNP biogenesis, structure and function.  
415 *Current opinion in cell biology* 2001; **13**(3): 290-301.
- 416 33. Hausmann S, Zheng S, Costanzo M, et al. Genetic and biochemical analysis of yeast  
417 and human cap trimethylguanosine synthase: functional overlap of 2,2,7-trimethylguanosine  
418 caps, small nuclear ribonucleoprotein components, pre-mRNA splicing factors, and RNA decay  
419 pathways. *J Biol Chem* 2008; **283**(46): 31706-18.
- 420 34. Zhang S, Li H, Zheng L, Li H, Feng C, Zhang W. Identification of functional tRNA-  
421 derived fragments in senescence-accelerated mouse prone 8 brain. *Aging (Albany NY)* 2019;  
422 **11**(22): 10485-98.
- 423 35. Hanada T, Weitzer S, Mair B, et al. CLP1 links tRNA metabolism to progressive motor-  
424 neuron loss. *Nature* 2013; **495**(7442): 474-80.
- 425 36. Schaffer AE, Eggens VR, Caglayan AO, et al. CLP1 founder mutation links tRNA  
426 splicing and maturation to cerebellar development and neurodegeneration. *Cell* 2014; **157**(3):  
427 651-63.
- 428 37. Ding Q, Zhu H, Zhang B, Soriano A, Burns R, Markesbery WR. Increased 5S rRNA  
429 oxidation in Alzheimer's disease. *J Alzheimers Dis* 2012; **29**(1): 201-9.
- 430 38. Lyons SM, Fay MM, Ivanov P. The role of RNA modifications in the regulation of  
431 tRNA cleavage. *FEBS Lett* 2018; **592**(17): 2828-44.
- 432 39. Frye M, Harada BT, Behm M, He C. RNA modifications modulate gene expression  
433 during development. *Science* 2018; **361**(6409): 1346-9.

434  
435



436

**Table 1.** Characteristics of study subjects

|                               | No abnormalities (CONT) | Alzheimer disease (AD) | Alzheimer disease with Vascular dementia (VaD+AD) |
|-------------------------------|-------------------------|------------------------|---------------------------------------------------|
| <b>Demographics</b>           |                         |                        |                                                   |
| Total patients (n)            | 7                       | 18                     | 9                                                 |
| Sex, male/female              | 5/2                     | 9/9                    | 6/3                                               |
|                               |                         |                        |                                                   |
| <b>Ethnicity</b>              |                         |                        |                                                   |
| White /unknown                | 6/1                     | 18/0                   | 9/0                                               |
| Age (years)                   | 85.4 ± 2.6              | 77.3 ± 2.6             | 79.6 ± 2.5                                        |
|                               |                         |                        |                                                   |
| <b>Brain</b>                  |                         |                        |                                                   |
| Weight (g)                    | 1286 ± 34.3             | 1130 ± 33 **           | 1180 ± 33.4*                                      |
| PH                            | 6.03 ± 0.08             | 6.15 ± 0.09            | 5.96 ± 0.08                                       |
|                               |                         |                        |                                                   |
| <b>Post-Mortem Delay Time</b> | 41.2 ± 4.9              | 36.9 ± 5.4             | 48.5 ± 7.6                                        |

437

438

439

Values are means ± SE, where appropriate. \* $p < 0.05$ , vs. control patients; unpaired  $t$ -test.

440

441 **Figure legends:**

442 **Figure 1.** Schematic illustration of LC-MS/MS for detection of RNA modifications. Total RNAs were extracted  
443 from brain tissue using the Trizol reagent and then urea-denatured-PAGE was performed to separate different  
444 RNA fragments. Targeted RNA fragments were cut according to their size, recovered from the gel, enzymatically  
445 treated to obtain single nucleosides, and then subjected to LC/MS-MS profiling. Raw mass spectrometry data were  
446 analysed using Xcalibur software, and the relative levels of different RNAs modifications were calculated.  
447

448 **Figure 2.** Small RNA (15–25 nt) modifications in the prefrontal lobe cortex of dementia patients. (a)  
449 Representative image showing purification of 15–25-nt small RNAs for the analysis of RNA modifications. (b–e)  
450 Increases in 2'-O-methylcytidine (Cm) and 7-methylguanosine (m<sup>7</sup>G) modifications, and reductions in N<sup>2</sup>,N<sup>2</sup>,7-  
451 trimethylguanosine (m<sup>2,2,7</sup>G) and N<sup>2</sup>,N<sup>2</sup>-dimethylguanosine (m<sup>2,2</sup>G) modifications in the cortex of AD and  
452 VaD+AD patients compared with CONT subjects (n = 7 for CONT, n = 18 for AD, n = 9 for VaD+AD; \*P < 0.05  
453 vs. CONT).  
454

455 **Figure 3.** Small RNA (30–40 nt) modifications in the prefrontal lobe cortex of dementia patients. (a)  
456 Representative image showing purification of 30–40-nt small RNAs for the analysis of RNA modifications. (b–g)  
457 Increases in 2'-O-methylcytidine (Cm), 2'-O-methyluridine (Um) and 7-methylguanosine (m<sup>7</sup>G) modifications,  
458 and reductions in 1-methylguanosine (m<sup>1</sup>G), N<sup>2</sup>,N<sup>2</sup>-dimethylguanosine (m<sup>2,2</sup>G) and pseudouridine (psi or Ψ)  
459 modifications in the cortex of AD and VaD+AD patients compared with CONT subjects (n = 7 for CONT, n = 27  
460 for AD; \* P < 0.05 vs. CONT).  
461

462 **Figure 4.** Reductions in 5S rRNA, tRNA-Tyr, and tRNA-Arg in prefrontal lobe cortex samples of AD patients,  
463 identified by small RNA sequencing. (a) Composition of small RNAs (15–25 nt). (b) Composition of small RNAs  
464 (34–40 nt). (c) 5s RNA, (d) tRNA-Tyr, (e) tRNA-Arg in the cortex of AD patients compared with CONT subjects  
465 (n = 4 for CONT, n = 6 for AD; \*P < 0.05 vs. CONT).  
466

467

468

469

470

471

472

473

474

475

476

477

478

**Figure 1.**

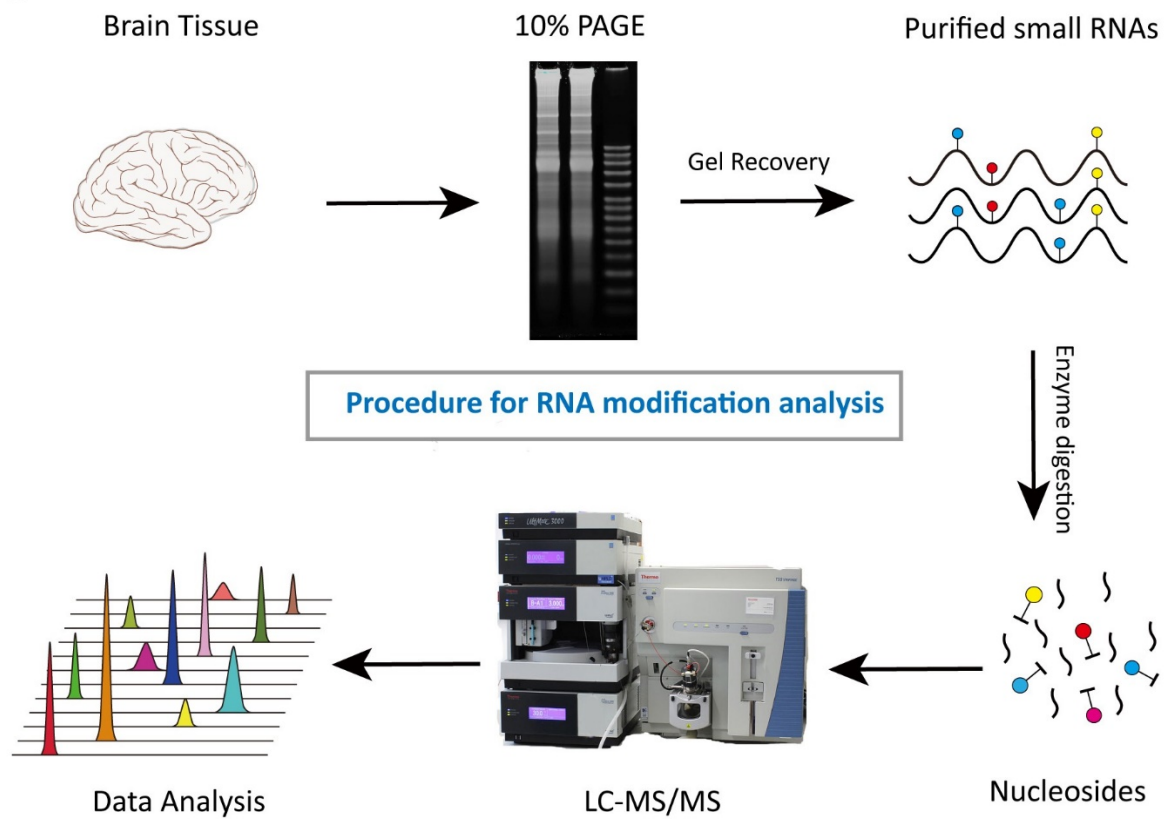

479

480

481

482

483

484

## Figure 2.

**A**

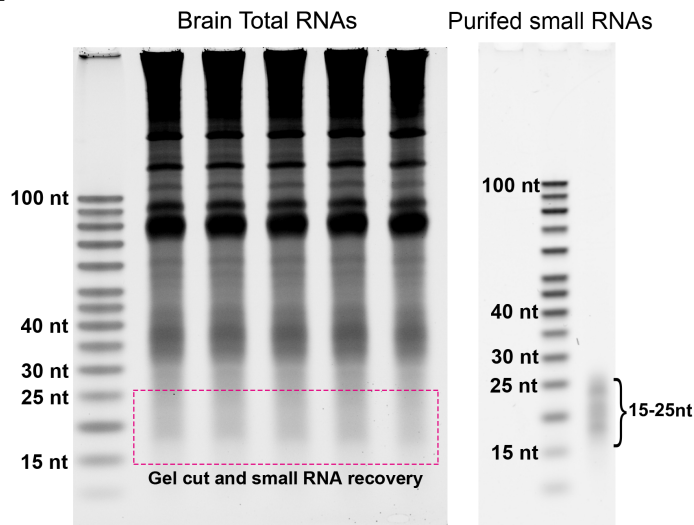

**B**

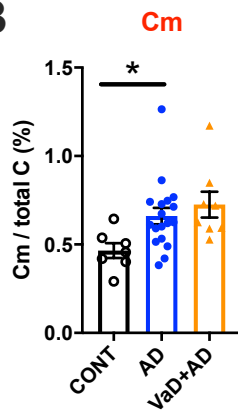

**C**

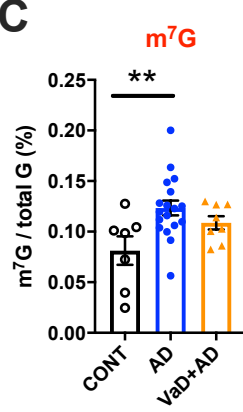

**D**

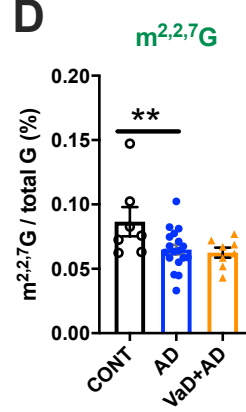

**E**

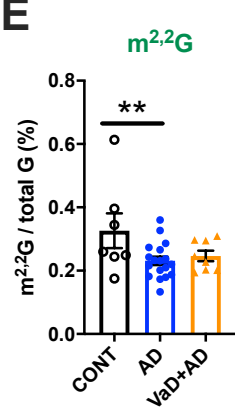

485

## Figure 3.

**A**

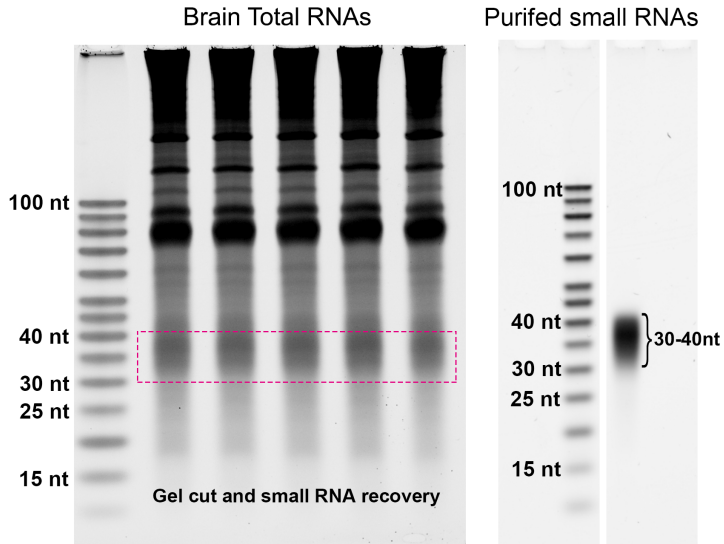

**B**

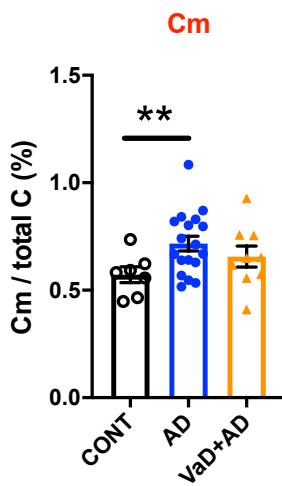

**C**

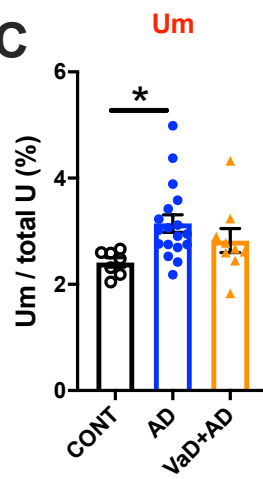

**D**

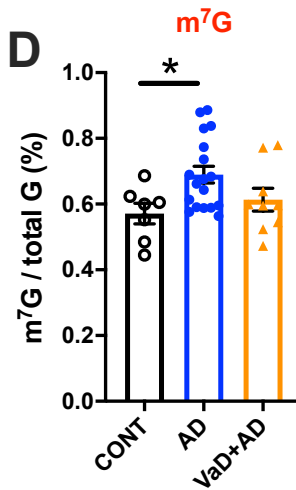

**E**

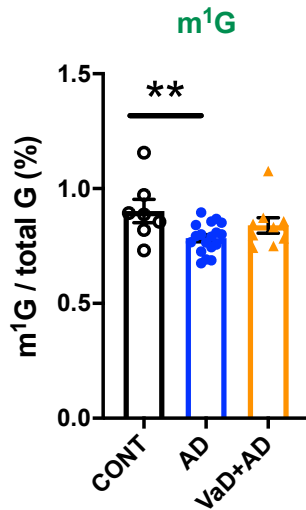

**F**

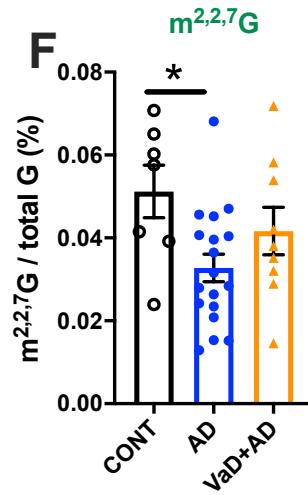

**G**

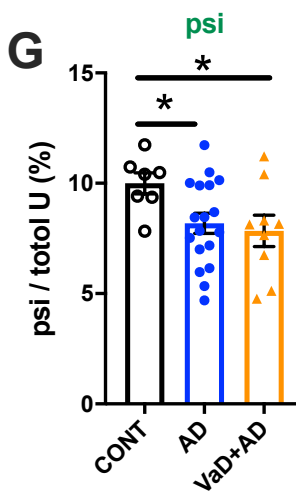

## Figure 4.

### A RNA Sequencing: Percentage of small RNA from 15-25nt

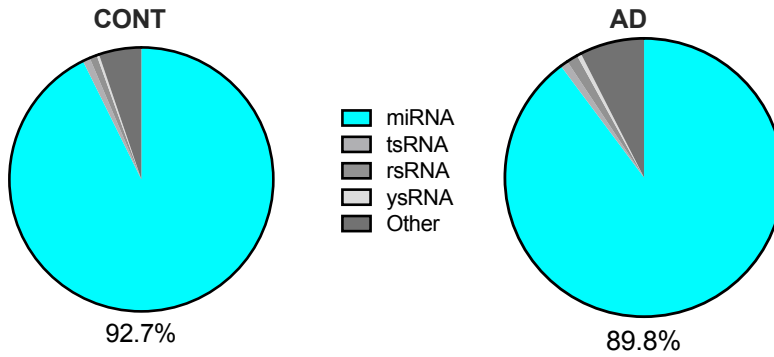

### B RNA Sequencing: Percentage of small RNA from 30-40nt

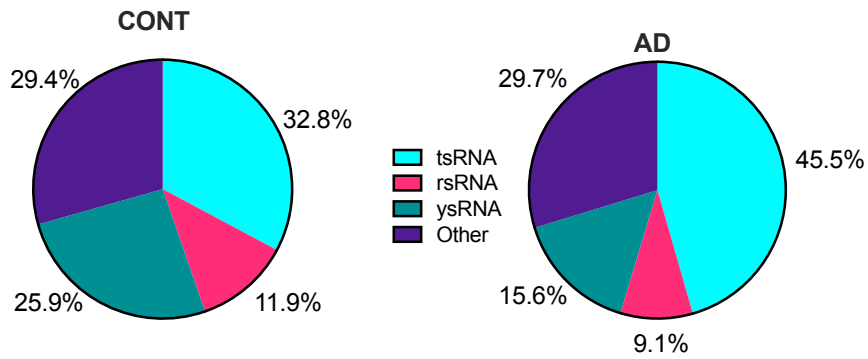

### C

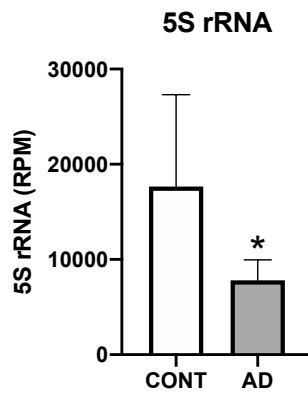

### D

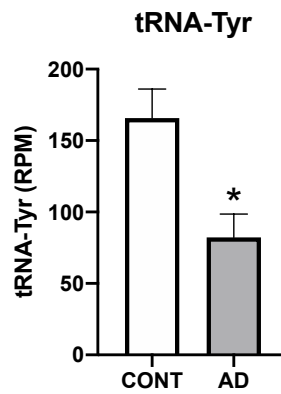

### E

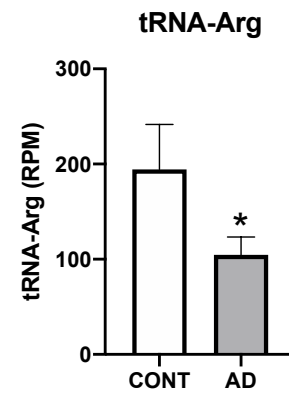

487

488

489

490

491
